# Supplementary material for: Are older adults of Rohingya community (Forcibly Displaced Myanmar Nationals or FDMNs) in Bangladesh fearful of COVID-19? Findings from a cross-sectional study
Source: PubMed Central journal article supplement (PMC8221477; doi:10.1371/journal.pone.0253648), 2021-06-23
Supplement: pone.0253648.s002.pdf [file pone.0253648.s002.pdf]

**ARCED FOUNDATION**  
**Impact of COVID-19 on Older Adults in Bangladesh**  
**Questionnaire**

Household ID     Date: 

|                      |                      |                      |
|----------------------|----------------------|----------------------|
| Day                  | Month                | Year                 |
| <input type="text"/> | <input type="text"/> | <input type="text"/> |

Respondent's name: ----- Father's name: -----

Village/Camp: -----   Union: -----

Upazila: -----  Mobile:

**A. Respondent's socio-demographic characteristics**

| Sl No | Questions                                                                    | Answer                                                            | Code                       | Skip to |
|-------|------------------------------------------------------------------------------|-------------------------------------------------------------------|----------------------------|---------|
| 1.    | How old are you now?                                                         | (Years)                                                           |                            |         |
| 2.    | Sex of respondent                                                            | Male<br>Female                                                    | 1<br>2                     |         |
| 3.    | What is your current marital status?                                         | Married<br>Widow/Widower<br>Divorced<br>Separated<br>Unmarried    | 1<br>2<br>3<br>4<br>5      |         |
| 4.    | Living arrangement                                                           | Alone<br>Spouse<br>Son<br>Daughter<br>Others, specify:            | 1<br>2<br>3<br>4<br>-96    |         |
| 5.    | Dependant on family for living                                               | Yes<br>No                                                         | 1<br>0                     |         |
| 6.    | Can read or write                                                            | Yes<br>No                                                         | 1<br>0                     |         |
| 7.    | What is your source of COVID-19 related information?<br>(Multiple responses) | Television<br>Radio<br>Mobile<br>Internet<br>Social media<br>None | 1<br>2<br>3<br>4<br>5<br>0 |         |
| 8.    | Family size                                                                  | (Number)                                                          |                            |         |

## B. Non-communicable chronic conditions

|     |                                                 | Are you currently suffering from any chronic disease?<br><br>[ENUMERATOR: Ask for each of the disease separately]<br><br>Code:<br>1. Yes<br>2. No<br>3. Don't know | Are you taking medication for this?<br><br>Code:<br>1. Yes<br>2. No<br>3. Don't know |
|-----|-------------------------------------------------|--------------------------------------------------------------------------------------------------------------------------------------------------------------------|--------------------------------------------------------------------------------------|
| 1.  | Arthritis                                       |                                                                                                                                                                    |                                                                                      |
| 2.  | Hypertension                                    |                                                                                                                                                                    |                                                                                      |
| 3.  | Heart disease                                   |                                                                                                                                                                    |                                                                                      |
| 4.  | Stroke                                          |                                                                                                                                                                    |                                                                                      |
| 5.  | Raised total cholesterol                        |                                                                                                                                                                    |                                                                                      |
| 6.  | Diabetes                                        |                                                                                                                                                                    |                                                                                      |
| 7.  | Chronic lung disease                            |                                                                                                                                                                    |                                                                                      |
| 8.  | Chronic kidney disease                          |                                                                                                                                                                    |                                                                                      |
| 9.  | Cancer                                          |                                                                                                                                                                    |                                                                                      |
| 10. | Other non-communicable disease                  |                                                                                                                                                                    |                                                                                      |
| 11. | Cataract                                        |                                                                                                                                                                    |                                                                                      |
| 12. | Other visual problem                            |                                                                                                                                                                    |                                                                                      |
| 13. | Auditory problem                                |                                                                                                                                                                    |                                                                                      |
| 14. | Other non-communicable disease (please specify) |                                                                                                                                                                    |                                                                                      |

## C. COVID-19 related information

|    |                                                                                                                                      |                                              |
|----|--------------------------------------------------------------------------------------------------------------------------------------|----------------------------------------------|
| 1. | How often you are concerned about COVID-19?                                                                                          | 1. Hardly<br>2. Sometimes/often              |
| 2. | How often you are overwhelmed by COVID-19?                                                                                           | 1. Hardly<br>2. Sometimes/often              |
| 3. | How often do you feel loneliness during this COVID-19?                                                                               | 1. Hardly<br>2. Sometimes/often              |
| 4. | Compared to the months before the outbreak began, how has the frequency of your communication with close friends and family changed? | 1. Same as previous<br>2. Less than previous |
| 5. | Did you faced any difficulty obtaining food during COVID-19                                                                          | 1. No difficult<br>2. Faced difficulty       |
| 6. | Did you faced any difficulty getting medicine during COVID-19                                                                        | 1. No difficult<br>2. Faced difficulty       |

|    |                                                                             |                                        |
|----|-----------------------------------------------------------------------------|----------------------------------------|
| 7. | Did you faced any difficulty receiving routine medical care during COVID-19 | 1. No difficult<br>2. Faced difficulty |
| 8. | Do you think older adults are at highest risk of COVID-19?                  | 1. Yes<br>2. No                        |

#### **D. Fear of COVID-19 Scale**

|    |                                                                                                   |                                                                                                       |
|----|---------------------------------------------------------------------------------------------------|-------------------------------------------------------------------------------------------------------|
| 1. | I am most afraid of coronavirus-19.                                                               | 1. Strongly disagree<br>2. Disagree<br>3. Neither agree nor disagree<br>4. Agree<br>5. Strongly agree |
| 2. | It makes me uncomfortable to think about coronavirus-19.                                          | 1. Strongly disagree<br>2. Disagree<br>3. Neither agree nor disagree<br>4. Agree<br>5. Strongly agree |
| 3. | My hands become clammy when I think about coronavirus-19.                                         | 1. Strongly disagree<br>2. Disagree<br>3. Neither agree nor disagree<br>4. Agree<br>5. Strongly agree |
| 4. | I am afraid of losing my life because of coronavirus-19.                                          | 1. Strongly disagree<br>2. Disagree<br>3. Neither agree nor disagree<br>4. Agree<br>5. Strongly agree |
| 5. | When watching news and stories about coronavirus-19 on social media, I become nervous or anxious. | 1. Strongly disagree<br>2. Disagree<br>3. Neither agree nor disagree<br>4. Agree<br>5. Strongly agree |
| 6. | I cannot sleep because I'm worrying about getting coronavirus-19.                                 | 1. Strongly disagree<br>2. Disagree<br>3. Neither agree nor disagree<br>4. Agree<br>5. Strongly agree |
| 7. | My heart races or palpitates when I think about getting coronavirus-19.                           | 1. Strongly disagree<br>2. Disagree<br>3. Neither agree nor disagree<br>4. Agree<br>5. Strongly agree |

**Thank You!**
