# Supplementary material for: Are older adults of Rohingya community (Forcibly Displaced Myanmar Nationals or FDMNs) in Bangladesh fearful of COVID-19? Findings from a cross-sectional study
Source: PubMed Central journal article supplement (PMC8221477; doi:10.1371/journal.pone.0253648), 2021-06-23
Supplement: pone.0253648.s003.pdf [file pone.0253648.s003.pdf]

## আর্কেড ফাউন্ডেশন

ইমপ্যাক্ট অফ কোভিড-১৯ অন ওল্ডার গ্র্যাডাল্টস ইন বাংলাদেশ

### প্রশ্নমালা

খানার আইডি:  তারিখ:

| দিন                  | মাস                  | বছর                  |
|----------------------|----------------------|----------------------|
| <input type="text"/> | <input type="text"/> | <input type="text"/> |

উত্তরদাতার নাম: -----

বাবার নাম: -----

গ্রাম/ক্যাম্প: -----

ইউনিয়ন: -----

উপজেলা: -----

মোবাইল:

### A. উত্তরদাতার আর্থ-সামাজিক অবস্থা

| ক্র. নং | প্রশ্নাবলী                                                            | উত্তর                                                               | কোড                        | স্কীপ |
|---------|-----------------------------------------------------------------------|---------------------------------------------------------------------|----------------------------|-------|
| 1.      | আপনার বর্তমান বয়স কত?                                                | (বছর)                                                               |                            |       |
| 2.      | উত্তরদাতার লিঙ্গ:                                                     | পুরুষ<br>মহিলা                                                      | 1<br>2                     |       |
| 3.      | আপনার বর্তমান বৈবাহিক অবস্থা কি?                                      | বিবাহিত<br>বিধবা, বিপত্নীক<br>বিবাহ বিচ্ছেদ<br>আলাদা<br>অবিবাহিত    | 1<br>2<br>3<br>4<br>5      |       |
| 4.      | থাকার ব্যবস্থা / কার সঙ্গে বসবাস করেন?                                | একা<br>স্ত্রী<br>পুত্র<br>কন্যা<br>অন্যান্য (উল্লেখ করুন):          | 1<br>2<br>3<br>4<br>-96    |       |
| 5.      | আপনি কে আপনার জীবনযাত্রা নির্বাহের জন্য আপনার পরিবারের উপর নির্ভরশীল? | হ্যাঁ<br>না                                                         | 1<br>0                     |       |
| 6.      | পড়তে বা লিখতে পারেন?                                                 | হ্যাঁ<br>না                                                         | 1<br>0                     |       |
| 7.      | কোভিড-১৯ এর তথ্য আপনি কোন মাধ্যম থেকে পান?<br>(একাধিক উত্তর প্রযোজ্য) | টিভি<br>রেডিও<br>মোবাইল<br>ইন্টারনেট<br>সামাজিক মাধ্যম<br>কোনটাই না | 1<br>2<br>3<br>4<br>5<br>0 |       |
| 8.      | পরিবারের সদস্য সংখ্যা                                                 | (নম্বর)                                                             |                            |       |

## B. নন-কমিউনিকেবল ক্রোনিক অবস্থা

|     |                                                     | ১.আপনি বর্তমানে কোনও দীর্ঘস্থায়ী রোগে ভুগছেন?<br>[এনুমেরেটর: প্রতিটি রোগের জন্য আলাদাভাবে জিজ্ঞাসা করুন]<br>কোড:<br>১. হ্যাঁ<br>২. না<br>৩. জানি না | ২. আপনি কি এর জন্য ওষুধ খাচ্ছেন?<br><br>কোড:<br>১. হ্যাঁ<br>২. না<br>৩. জানি না |
|-----|-----------------------------------------------------|------------------------------------------------------------------------------------------------------------------------------------------------------|---------------------------------------------------------------------------------|
| 1.  | বাত / আর্থরাইটিস                                    |                                                                                                                                                      |                                                                                 |
| 2.  | উচ্চ রক্তচাপ                                        |                                                                                                                                                      |                                                                                 |
| 3.  | হৃদরোগ                                              |                                                                                                                                                      |                                                                                 |
| 4.  | স্ট্রোক                                             |                                                                                                                                                      |                                                                                 |
| 5.  | উচ্চ মোট কোলেস্টেরল                                 |                                                                                                                                                      |                                                                                 |
| 6.  | ডায়াবেটিস                                          |                                                                                                                                                      |                                                                                 |
| 7.  | দীর্ঘস্থায়ী ফুসফুসের রোগ                           |                                                                                                                                                      |                                                                                 |
| 8.  | দীর্ঘস্থায়ী কিডনি রোগ                              |                                                                                                                                                      |                                                                                 |
| 9.  | ক্যান্সার                                           |                                                                                                                                                      |                                                                                 |
| 10. | অন্যান্য অসংক্রামক রোগ                              |                                                                                                                                                      |                                                                                 |
| 11. | ছানি                                                |                                                                                                                                                      |                                                                                 |
| 12. | অন্যান্য দৃষ্টিসংক্রান্ত সমস্যা                     |                                                                                                                                                      |                                                                                 |
| 13. | শ্রাবণ সমস্যা                                       |                                                                                                                                                      |                                                                                 |
| 14. | অন্যান্য অসংক্রামক রোগ<br>(অনুগ্রহ করে উল্লেখ করুন) |                                                                                                                                                      |                                                                                 |

## C. কোভিড-১৯ সম্পর্কিত তথ্য

|    |                                                                                                                       |                                          |
|----|-----------------------------------------------------------------------------------------------------------------------|------------------------------------------|
| 1. | কোভিড-১৯ মহামারী সম্পর্কে আপনি কি উদ্বিগ্ন/ চিন্তিত?                                                                  | ১. তেমন নয়<br>২. কখনও কখনও/প্রায়ই      |
| 2. | কোভিড-১৯ মহামারী নিয়ে আপনি কি অস্বস্তি বোধ করছেন?                                                                    | ১. তেমন নয়<br>২. কখনও কখনও/প্রায়ই      |
| 3. | কোভিড-১৯ মহামারীতে আপনি কি একাকীত্ব বোধ করছেন?                                                                        | ১. তেমন নয়<br>২. কখনও কখনও/প্রায়ই      |
| 4. | প্রকোপ শুরুর আগের মাসগুলির তুলনায়, আপনার ঘনিষ্ঠ বন্ধুবান্ধব এবং পরিবারের সাথে আপনার যোগাযোগ কীভাবে পরিবর্তিত হয়েছে? | ১. আগের মতই আছে<br>২. আগের থেকে কমে গেছে |

|    |                                                                                         |                                     |
|----|-----------------------------------------------------------------------------------------|-------------------------------------|
| 5. | কোভিড-১৯ মহামারীতে আপনি কি খাবার সংগ্রহ করতে সমস্যায় পড়েছেন?                          | ১. সমস্যা হয়নি<br>২. সমস্যা হয়েছে |
| 6. | কোভিড-১৯ মহামারীতে আপনি কি গুঁষধ সংগ্রহ করতে সমস্যায় পড়েছেন?                          | ১. সমস্যা হয়নি<br>২. সমস্যা হয়েছে |
| 7. | কোভিড-১৯ মহামারীতে আপনি কি আপনার নিয়মিত চিকিৎসা পেতে সমস্যায় পড়েছেন?                 | ১. সমস্যা হয়নি<br>২. সমস্যা হয়েছে |
| 8. | আপনি কি মনে করেন ওল্ডার এ্যাডাল্টসদের কোভিড-১৯ এ সংক্রামিত হওয়ার সম্ভাবনা সবথেকে বেশি? | ১. হ্যাঁ<br>২. না                   |

#### D. কোভিড-১৯ সম্পর্কিত ভয়ের স্কেল

|    |                                                                                       |                                                                                             |
|----|---------------------------------------------------------------------------------------|---------------------------------------------------------------------------------------------|
| 1. | আমি করোনাভাইরাস-১৯ নিয়ে খুব ভীত                                                      | ১. দৃঢ়ভাবে অসম্মত<br>২. অসম্মত<br>৩. অসম্মতও না সম্মতও না<br>৪. সম্মত<br>৫. দৃঢ়ভাবে সম্মত |
| 2. | আমি করোনাভাইরাস-১৯ সম্পর্কে ভাবতে অস্বস্তি বোধ করি                                    | ১. দৃঢ়ভাবে অসম্মত<br>২. অসম্মত<br>৩. অসম্মতও না সম্মতও না<br>৪. সম্মত<br>৫. দৃঢ়ভাবে সম্মত |
| 3. | করোনাভাইরাস-১৯ সম্পর্কে ভাবলে আমার হাত ঘেমে ওঠে                                       | ১. দৃঢ়ভাবে অসম্মত<br>২. অসম্মত<br>৩. অসম্মতও না সম্মতও না<br>৪. সম্মত<br>৫. দৃঢ়ভাবে সম্মত |
| 4. | আমি করোনাভাইরাস-১৯ এর কারণে আমার জীবন হারানোর ভয় পাচ্ছি                              | ১. দৃঢ়ভাবে অসম্মত<br>২. অসম্মত<br>৩. অসম্মতও না সম্মতও না<br>৪. সম্মত<br>৫. দৃঢ়ভাবে সম্মত |
| 5. | সোশ্যাল মিডিয়াতে করোনাভাইরাস-১৯ সম্পর্কিত খবর বা গল্পগুলো দেখে আমি উদ্ভিগ্ন হয়ে পরি | ১. দৃঢ়ভাবে অসম্মত<br>২. অসম্মত<br>৩. অসম্মতও না সম্মতও না<br>৪. সম্মত<br>৫. দৃঢ়ভাবে সম্মত |
| 6. | করোনাভাইরাস-১৯ এ আক্রান্ত হওয়ার ভয়ে আমি ঘুমতে পারিনা                                | ১. দৃঢ়ভাবে অসম্মত<br>২. অসম্মত<br>৩. অসম্মতও না সম্মতও না<br>৪. সম্মত                      |

|    |                                                         |                                                                                             |
|----|---------------------------------------------------------|---------------------------------------------------------------------------------------------|
|    |                                                         | ৫. দৃঢ়ভাবে সম্মত                                                                           |
| 7. | করোনাভাইরাস-১৯ এ আক্রান্ত হওয়ার ভয়ে আমার বুক ধরফর করে | ১. দৃঢ়ভাবে অসম্মত<br>২. অসম্মত<br>৩. অসম্মতও না সম্মতও না<br>৪. সম্মত<br>৫. দৃঢ়ভাবে সম্মত |

**ধন্যবাদ!**
